# Supplementary material for: Frameshifting at collided ribosomes is modulated by elongation factor eEF3 and by integrated stress response regulators Gcn1 and Gcn20
Source: PubMed Central journal article supplement (PMC8848926; doi:10.1261/rna.078964.121), 2022-03

SF 1

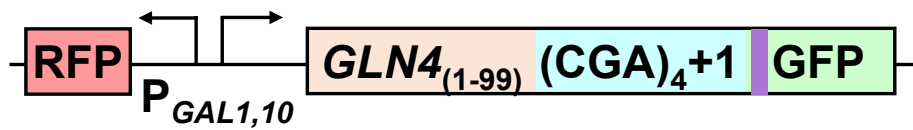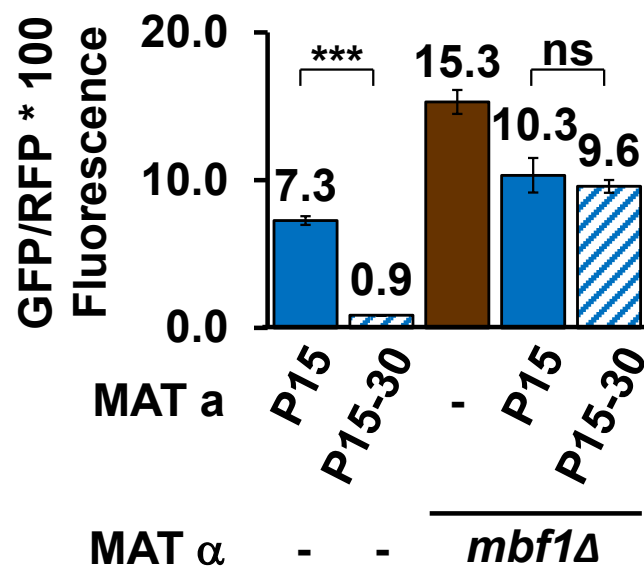

Supplement: supp_078964.121_Supplemental_Fig_S1.pdf [file supp_078964.121_Supplemental_Fig_S1.pdf]
