# Supplementary material for: Frameshifting at collided ribosomes is modulated by elongation factor eEF3 and by integrated stress response regulators Gcn1 and Gcn20
Source: PubMed Central journal article supplement (PMC8848926; doi:10.1261/rna.078964.121), 2022-03
Supplement: supp_078964.121_Supplemental_Fig_S2.pdf [file supp_078964.121_Supplemental_Fig_S2.pdf]

SF 2

1 10 20 30 40 50 60 70 80 90 100 110 120 130  
S.cerevisiae M S D S Q G S T K V L E E L F Q K L S V A T A - D N R H E I A S E V A S F L N - G N I I E H O V P E H F F G L A K G I - - - K D K T A A N M Q V A H I A N Q S N L S P S V E P Y I V Q L V P A I C T N A G N K D K E I Q S V A S E T I S I N V A N V  
K.lactis M S D S Q S V K V L N E L F E K L V T A T A - D N R S I A I N E V A S F L N - G N I I E H O P P E E F F A N L S K A I - - - K D K T A A N V L E V A H I A S E S G L S P S V E P F I V N L V P S I C D K A G D K D K E I Q V L A S D A L L A T A K A I N  
C.albicans M S A R S E S Y S T V E L L S E L L S K L Q V A - - - D N K D E A R S N I S T F L N - G S I V E H V P V E F F E D L K Q I T - Q S D K A V S L A A L D A Y K H A T S I N G L S P S V E P Y V D L V S E V A Y K A G D K D K D I Q A R S D A L L A T A S A I T  
Y.lipolytica M S A Q K E A I T H T L S E L F E K L S V S D S L E S R L E A N N V A T V Y N Q D G V I E H O V P M Q L L A R T K A K L N Q K D Q A A V L N A L Q L L N S L A T S S S V A P N V P L V K E I D V A L K A G D K D K I Q D A A R K T A K D A C I T  
N.crassa M S A K E N A Q S L K V L D E L N Q K L T I A N E A D A V K A S E I V A S F I N - G R T Q D L D T P V K Y T E A L K K Q L A N K D A T A R E K A L S A I Q A T A Q H S E V A H V E P Y L V A L L P S V F T A G O K T T A V K N A R I A A R L A T A E A I N  
S.pombe M S R A K S E S Y S V K R A L E E L L K H L V T D A R E A - D A N K A L A S F V N - G P I E E Q A P S Q V S F A S I S K Q L - N D K N A T A R E V L K G L E A Y A N H G S V A D V E P Y L L E L L P V A R K V D K Q M A V R D A I A S R A K L A V R C I T  
P.infestans M A P Y A P T D G I S K L A E E L L K E A L K E A L K S S A D Q Q K V R A E K V S E L V A G D R A N L N L G V S Q E L R M L T G N D A R K V V R A H V D D L H Q K H A E R V E L A V L L P L L S V F L D L L Q E K P T V R P Y A Q R A L T I T S S A N  
Consensus n...e.qs.k.l.#.l.kltva.....aa..asf.n.g...e.D.p.....k.....kd..a..vl.a.....a...a..VEpYlv.lip.v..kagDK...!..a#.aalal...n

131 140 150 160 170 180 190 200 210 220 230 240 250 260  
S.cerevisiae P V A I K A L P L L T N A I V E T N K K Q E K I A I L A R I S A H V D A R K Q V A L R M P E L I P V L S E T M H D T K K E V K A A R T A A M T K A T E T V D N K D I E R F I P S L I Q C I A D P T E V P E T V H L L G A T T F V E V T P A T L S I N V P L L S  
K.lactis P A A I K A F L P L L T S A L D S T S K M E K V S I L A V I S V L V D T A K E Q L G L R M P E L I P A L S E A M H D T K K E V K A A R T A T I T K A T E T V E N K D I E R F I P K L I E C I A D P S E V P E T V H L L G A T T F V E V T P A T L S I N V P L L N  
C.albicans P T A V K A I L P K L I D N L T N T K A T E K V A I L R A V S Q L V D T A K A Q I A L R M P E L I P V L S E A M H D T K K E V K A A R T A T I T K S T E T D N K D I E K F I P Q L I S C I A K P T E V P E T V H L L G A T T F V E V T P A T L S I N A P L L S  
Y.lipolytica P R S V K F L P L K I E S L V N T N K M P E K V A L E C I S I L V T Y A R Q V A L R M P E L I P V L S E A M H D T K K E V K A A R T A T I T K S T O T D N K D I E K F I P A L I A C I S K L E P F V K T V H I L G A T T F V E V T P A T L S I N A P L L S  
N.crassa P N A V K A T A L N P L I D T N A R N A Q K E K N T A L D I D T I R T A P Y V G L L V P D I P V S E A M H D T K K E V K A A R T A T I T K M C L Q L V N R D I E R F I P E L I C I A K P E N V P E T V H L L G A T T F V E V T P A T L S I N V P L L D  
S.pombe P Y A V K A T L N P V L E S H T T G K M E K N S L Q L L D V L V E P A P S Q L S Y L P I P V P S E A M H D T K K E V K A A R T A T I T K V C T L A N A D I D R F I P E L I C I A H P E V P E T V H I L G A T T F V E V T P A T L S I N V P L L A  
P.infestans K M S T I R I L P I L F D G L D R S K K Q T K G A L D L I A E L S K A P P Y Q V G R C L P D I I P Q V T C H M D T R K E V K Y A R D T H T K Y C V W V G N D I E P F I P A L Y S C L A M P T E V P E C T H K L A S T T F V K T E A P A L A I N E P L L K  
Consensus p..avkailp.l.#.l.t.kk.ek..al..i..lv.vap.qv.l..P#IPV.s#.MHDtkkEVK..aa..Tntk.c...!..N.DierFIP.L!.Cia.Pt#VPEvH.lgaTTFV.evt..pLsihvPLL.

261 270 280 290 300 310 320 330 340 350 360 370 380 390  
S.cerevisiae R G L N E R E T G I K R K S A V I D N M C K L V E D P Q V I A P F L G K L P L G L K N F A T I A D P E A R E V T L R A L K T L R V G V G E D D A T P E V S H A G D V S T T L Q V V N E L L K D E T V A - P R F K I V E Y E I A R I G A D I D E R I D Q  
K.lactis R G L A R E T S I K R K A R A V I D N M C K L V E D P Q V V A P F L E K L P L G L K N F A T I A D P E A R E V T L R G L K T L R V G V G A D D V L P E V S H A G D I A T T R S V L D R L L K D Q K V A - S R F D P V L Y T A R A I D I D E R I D Q  
C.albicans R G L A E R D T A I K R K A R A V I D N M C K L V E D P Q V V A P F H D K L P L G K - N F A N H A D P E A R E V T Q R A L N T L R V G V G A D D E T P E V S T A G D I D V T L N E F N K L V A D K I A - K R F D V A L N Y T A R A I G A D L D E R I E I P  
Y.lipolytica R G L A E R D T A I K R K A R A V I D N M C K L V E D P Q V V A P F L E T L Y P A L K N F A T I A D P E A R D V T L R A L N T L R V G E I - V D D K P E V S T A G D T K V N L A I L E K L E P F V K T - K F G L M H M F A S T S G D L D E R I E I P  
N.crassa R G L N E R D T A I K R K A R A V I D N M C K L V D D P N I V A P F L P K M P A L Q N Y D N L A D P E A R E K T Q A L D T L R V G V N V - V D G K P E A Q N P G D I N I V L G H L K E V L G S K Y A S F E K S T A I V E Y A R A G Q L V E S K A T E S  
S.pombe R G L N E R S T P I K R K A R A V I D N M C K L V E D P Q V V A P F L P K L P L G L V I A T P E C R S V Y A I T L L R V G N V - V D G K P E V S T A R N P E V C L E T L K A V L G E I K V P T - - N E E V I A Y V A N A Q L V E K O N E N  
P.infestans R A L A E G K T A Y K R Q A R A V I D N M C K L H D P A E A Q L F I P K L P L G L K V Y E T A D P E C R E V A T A H E T L F V A G G - S M E V S E D E L K V O Y A I N H K V Y V E S T A R N P T A V K A N I D S F V Y D Y T G I C Y F L V S R F N K  
Consensus RgLaEr.TaIKRkaRVIIDmckLv#DPq.vapfPk#lPgLk.n.t.aDPeArev.rAl.TL.rvGnv..d..ip#vs.agd...l.l..l..k.....%!a!.a..!l.er....

391 400 410 420 430 440 450 460 470 480 490 500 510 520  
S.cerevisiae Q A A F T H I P Y T I F L H E K K K D I L D E F R K R A Y D N I P V G P M F D D E E D G - E D L C N C E F S L A Y G A K I L L N K T Q L R L K R R R Y G L C G P N G C G K S T L M R A I N A G V G E G F P T Q E C R T V Y V E H D Z G T H S D T S V L  
K.lactis Q A A F T H I P Y T I F A H E R T A K E I D E F R K R A Y D N I P V G P M F D D E E D G - E D L C N C E F S L A Y G A K I L L N K T Q L R L K R R R Y G L C G P N G A G K S T L M R A I N A G V G E G F P T Q E C R T V Y V E H D Z G T H S D T S V Y  
C.albicans E A L Q N V L P F A T I F L H E K A K E I E F R K R A I D N I P Q P S F E D E E D G - E D L C N C E F S L A Y G A K I L L N K T Q L R L K R R R Y G L C G P N G A G K S T L M R A I N A G V G E G F P T Q E C R T V Y V E H D Z G T H S D T S V Y  
Y.lipolytica A D A R S L A V A F M Y T L P E K D A R T V I E S L R K Q A I N I P G A T N F E E D E E D G - E D L C N C E F S L A Y G A K I L L N K T Q L R L K R G R Y G L C G P N G A G K S T L M R A I N A G V G E G F P T Q E C R T V Y V E H D Z G T H S D T S V Y  
N.crassa S I A H A R A V P Y L T V I V G A E S E R V T D A L R K K A T P G A A E A D E A D E E E G - E D L C N C T F S L A Y G A K I L L N Q T H L R L K R G R Y G L C G P N G S G K S T L M R A I N A G V G E G F P K Q S E V K T V F V E H D Z G T H S D T S V I  
S.pombe E S H V L N T P Y L T A F I D E A H I K I V E Q L R T R S I A I P G G A S H A E E E E G - E D L C N C E F S L A Y G A K I L L N R T L R L K R G R Y G L C G P N G S G K S T L M R A I N A G V G E G F P T H - L R T V Y V E H D Z E S E A D T P S V Y  
P.infestans A V F E K E I T T Y I K A F K P E E I K P L A N E I R D R C F K E N S I F I E D V C D E G I P D L C N C E F S L A Y G A K I L L N R L R L K R G R Y G L C G P N G C G K S T L M R A I N A G V G E G F P S R D E L K T V F V E H D Z Q S E A D T P S V Y  
Consensus #..u...itp%.t.f..e.e.k...#.e.Rkra...ip.....#.EG.EDLCNCFSLAYGakILL.n.t.lRLKgrRYGLCGPNG.GKSTLMRAI.NGv#GFftq.e.ktVZv#H#i#...a#.t.v!

521 530 540 550 560 570 580 590 600 610 620 630 640 650  
S.cerevisiae D F V F E - S G - V G - - - T K E A I K D K L I E F G F D E H I A M P I S A L S G G A K H K L A R A V L R N A D I L L D E P T N H L D T V N V A L Y N Y L - N T C G I T S I I V S H D S F L D V N V C E Y I I N Y E G L K R Y K G N F T F V K K C P  
K.lactis D F V F S - G N - V G - - - T K D V I T O K L R E F G F S D E H I A M P I A S L S G G A K H K L A R A V L R N A D I L L D E P T N H L D T V N V A L Y N Y L - N T C G I T S I I V S H D S F L D V N V C E Y I I N Y E G L K R Y K G N L S E F V K K C P  
C.albicans E F V I E - D G E V G L - - - T K D V Y D K L R E F N F S D E H I N M P I Q S L S G G A K H K L A R A V L R N A D I L L D E P T N H L D T V N V A L Y N Y L - N T C G I T S I I V S H D S G F L D V N V C E Y I I N Y E G F K L R Y K G N L S E F V K K C P  
Y.lipolytica D Y V R K T A S E S I G - - - T E E E V R K L D O L F L I D E H I A M P I T S L S G G A K H K L A R A V L R N A D I L L D E P T N H L D T V N V A L Y N Y L - N T C G I T S I I V S H D S G F L D V N V C E Y I I N Y E G F K L R Y K G N L S E F V K K C P  
N.crassa D M T H K K L K E A G V D T S D R E D E A K L A E F G F S P D N T K M D I S A L S G G A K H K L A R A V L R N A D I L L D E P T N H L D V N V A L E D Y L - K S S P C T S I I V S H D S G F L D V N V C E Y I I N Y E R F K L R Y K G N L K D F V A R V P  
S.pombe D F T L Q D P A P T I K - - - P R E I V K A L E N S F T D E L I N M P I G S L S G G A K H K L A R A V L R N A D I L L D E P T N H L D V N V A L E N F L A E N F L Q M D V S S I I V S H D S G F L D V N V C E Y I I N Y E G F K L R Y K G N L S E F V K K C P  
P.infestans D F T L V D E D L K N T - - - P R K E V E D T L A G V G F T A E N Q A Q G V G T L S G G A K H K L E R A R M L Q A D I L L D E P T N H L D V N V A L E N Y L T S L N V T S I N V S H D S G F L D V N V C E Y I I N Y E T R K L K Y K G N L S K F V E Q K P  
Consensus #f.....r.e!.d.l.d.l.f.d.f.#i.np!.sLSGGAKMLaLarAvl..aDILLDEPTNHLDvvnVale#%!.n....tSiVSHDSGFLD.Vcq.IIHYE.fkLrkykGn#sefVkk.P

651 660 670 680 690 700 710 720 730 740 750 760 770 780  
S.cerevisiae A A K A Y E E L S N T D L E F P P E P G L E G V K T K A K A I V K Y T N H F Q Y P G T S K P Q I T D I N F Q C S L S S R I A V I G P N G A G K S T L I N V L T G E L L P T S G E V Y T H E N C R I A Y I K Q A F A H I E S H L O K T P S E Y I Q A R F Q T G  
K.lactis T A K S Y Y E L G A S E L F R P P E P G L E G V K T K A K A I V K Y S N H T F Q Y P G T A K P Q I S O I S F Q C S L S S R I A V I G P N G A G K S T L I N V L T G E L L P T V G E V Y T H E N C R I A Y I K Q A F A H I E S H L O K T P S E Y I Q A R F Q T G  
C.albicans S A Q S Y Y E L G A S D L F R P P E P G L E G V K T K A K A I V K Y S N H S F Q Y P G T S K P Q I D I N F Q C S L S S R I A V I G P N G A G K S T L I N V L T G E L L P T T G E V Y T H E N C R I A Y I K Q A F A H I D N L D K T P S E Y I Q A R F Q T G  
Y.lipolytica S A K S Y Y E L G A S E T N F S P P E P G L E G V K T K A K A I V K Y Q N H T F Q Y P G T K P Q I R N V S F Q C S L S S R I A V I G P N G A G K S T L I N V L T G E L L P T S G E V Y A H E N C R I A Y I K Q A F A H I D S L D T P S E Y I Q A R F Q T G  
N.crassa S A K S Y Y E L G A S E N F S P P E P G L E G V K T K A K A I L R A T K N S F Q Y P G T A K P Q I S O I S F Q C S L S S R I A V I G P N G A G K S T L I N V L T G E L L P T G E Y T H E N C R I A Y I K Q A F A H I D N L D K T P S E Y I Q A R F Q T G  
S.pombe S A K S Y Y E L G A S E N F K P P E P G L E G V K T K A R A I K V Q H S F Q Y P G T S K P Q L N D I S F Q S L S S R I A V I G P N G A G K S T L I K V L T G E L L P T V G E Y T H E N C R I A Y V A Q A F H I L G H P D K T P S E Y I Q A R F Q S G  
P.infestans E A K A Y Y E L E S E N V K I P P E P G F L A I K N G K P I I R L T N C S Y Q Y P G T K P Q I N N I S V C A L S S R I A V I G P N G A G K S T L I K H L T G E V E P T S G V A K H P S R F A Y V A Q A F H I E S H L D E T A N Q Y Q A R F Q S G  
Consensus sAkSYyELeg#.eF..FPEPGLeg!Kt.KqKaI.v.nns%QYGPt.KPqi.#!sfQCSLSSRIAVIGPNAGKSTlInVLtGellPt.G#vy.HencRiAYlKqAfAHIESHlDkTpsEYIQRfQ6

781 790 800 810 820 830 840 850 860 870 880 890 900 910  
S.cerevisiae E D R E T H R A N R Q I N E D A E A R N - N K I F K I E G T P R R I A G I H A R R K F K N T Y E Y E C S F L L G E N I G M K S E R A V P H M S V D N A H P R G E L V E S H S K H V A E V - - - D M K E A L R S G Q F R P L T R K E I E E C A M L G L D P E I V S  
K.lactis E D R E T H R A N R V I N E D D A E A R N - N K I F K I E G T P R R I A G I H A R R K F K N T Y E Y E C S F L L G E N I G M K S E R A V P H M S V D N A H P R G E L V E S H S K H V A E V - - - D M K E A L R S G Q F R P L T R K E I E E C A M L G L D A E L V S  
C.albicans E D R E T H R A S R Q I N E E D E A R N - N K I F K I E G T P R R I A G I H A R R K F K N S Y E Y E I S H M L G E N I G M K S E R A V P H M S V D N A H P R G E L M E T H A K L V A E V - - - D M K E A L R S G Q F R P L T R K E I E E C A M L G L D A E L V S  
Y.lipolytica E D R E T H R A N R Q I T D S E A R N - N K I Y K I E G T P R R V A G I H A R R K F K N S Y E Y E C S F L L G E N I G M K S E K A I P H G S V D N A H P R S E L M E S H S K L V A E V - - - D M K E A L R S G Q F R P L T K E I E A N C A M L G L E P E L V S  
N.crassa E D R E T H R A N K I I T E A D E A R N - N K Y F K I E G T P R R V I G I H A R R K F K N S Y E Y E C S F A L G E N I G M K S E R A V P H M S V D N A H P R E L L A S H Q K V A D V - - - D M K E A L R S G Q F R P L V R K E I E S H C A M F L D A E L V S  
S.pombe E D L E A H K A S R V T S E A D E A R N K N K F T K I E G T Q R K I L G I H S R R K L N S Y E Y E C S F L G E N I G M K S E R A V P H M S V D N A H P R G E L M E T H A K A V A E V - - - D R A E R L S G Q F R P L T R K E I E E C S L G L D A E L V S  
P.infestans E D K E L L A K R T K L S K E E K E H Y - K P P V N E G E K R V L E E I Y S R R K F K S E Y E L - - - K M E K P V D N A H P R E K E C K E G A D K L L Q I A D D R E A R R A M L Q A R P P T A I A V Q H L D C F L G A G E F T  
Consensus EDaEt#kra.r.i.e.#eean.KifkIEGtpRr..g!hsRRKfKnsZEYcSf.lgenignk.erVapnms.DnaHlPR.eI.e.h.knva#!..DnkeRlaseQfRPltrke!#.h..!GLdaEIVs

911 920 930 940 950 960 970 980 990 1000 1010 1020 1030 1040  
S.cerevisiae H S R I R G L S G G Q K V K L V L A A G T H Q R P H L I V L D E P T N Y L D R D S L G A L S K A L K A F E G G V I I T H S A E F T K N L T E E V A R V K D G R M T P S G H N V S G G A G R P R I E K K E D E E - D K F A M G N K I A G G K K K L S S A E L  
K.lactis H S R I R G L S G G Q K V K L V L A A C T H Q R P H L I V L D E P T N Y L D R D S L G A L S K A L K A F E G G V I I T H S A E F T K N L T E E V A R V K D G R M T P S G H N V S G G A G R P R I E K K E D E E - D K F A M G N K I A S A K K K T K L S S A E L  
C.albicans H S R I R G L S G G Q K V K L V L A A C T H Q R P H L I V L D E P T N Y L D R D S L G A L S K A L K A F E G G V I I T H S A E F T K D L T E E V A R V K D G R M T P S G H N V S G G A G R P R I E K K D E E E D K F A M G N K I A R A K K K K L S S A E L  
Y.lipolytica H S R I R G L S G G Q K V K L V L A A C T H Q R P H L I V L D E P T N Y L D R D S L G A L S K A L K A F E G G V I I T H S A E F T K D L T E E V A R V K D G R M T P S G H N V S G G A G R P R I E K K G E E E E E K F A M G N K I A Y S E K K K A K L S S A E L  
N.crassa H S R I R G L S G G Q K V K L V L A A C S Q R P H L I V L D E P T N Y L D R D S L G A L S K A L K A F E G G V I I T H S A E F T K D L T E E V A R V K D G R M T P S G H N V S G G A G R P R I E K K D E E E E E K F A M G N K I Y S T K K A K L S S A E L  
S.pombe H S R I R G L S G G Q K V K L V L A A C T H Q R P H L I V L D E P T N Y L D R D S L G A L S K L K N F G G V I V T H S A E F T E G L T E E V A R V N G K M T P S G H N V S G G A G R P R I E Q E - E E G D T D A F G M K I E K A K K K L T G A E L  
P.infestans H S R I R G L S G G Q K V K Y V L A A M L M P H L I V L D E P T N Y L D R D S L G A L S A I K E F N G G V I I T H S A E F S S A L T Q E T A N V E A G F L V - - - - I E G Q A R E K I E Q K N E E V T A D F A G N - V Y T K I K R K L T R K E K  
Consensus HSRlRGLSGGQkVklVlaAGtHqRPHlIvLDEPTNYLDRDSLgAlSkAlKaFEGGVIIThsAEFTkNLteeVArVkdGrMTPSGhNVsGGAGRPRIEKKEDEE-DKfAMGNkiAGGkKkKlSSAE

1041 1050 1060 1065  
S.cerevisiae R K K K K E R M K K K K E L G D A Y V S S D E E F  
K.lactis R K K K K E R M K K K K E L G D A Y V S S D E E F  
C.albicans R K K K K E R M K K K K E L G D A Y V S S D E E F  
Y.lipolytica R K K K K E R M K K K K E Q D A Y V S S D D D F  
N.crassa R K K K K E R M A R R K - G E E V F S D E D F  
S.pombe R K K K K E R M A R R K - A G L E V S D E E L  
P.infestans K A K D K A R - K E A R E A R G E Y S D S D E L  
Consensus rkkkKeRnk..k..g..yvss##ef
