# Supplementary material for: Frameshifting at collided ribosomes is modulated by elongation factor eEF3 and by integrated stress response regulators Gcn1 and Gcn20
Source: PubMed Central journal article supplement (PMC8848926; doi:10.1261/rna.078964.121), 2022-03

SF 5

A

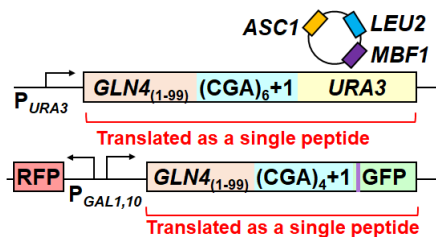

B

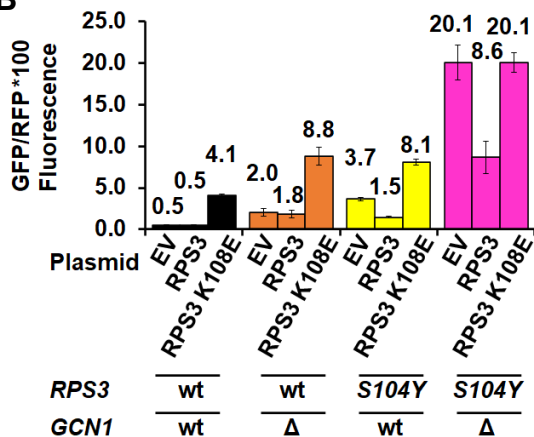

C

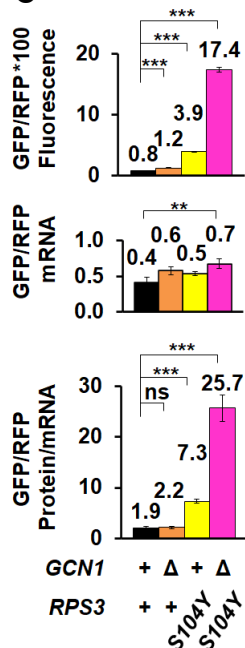

D

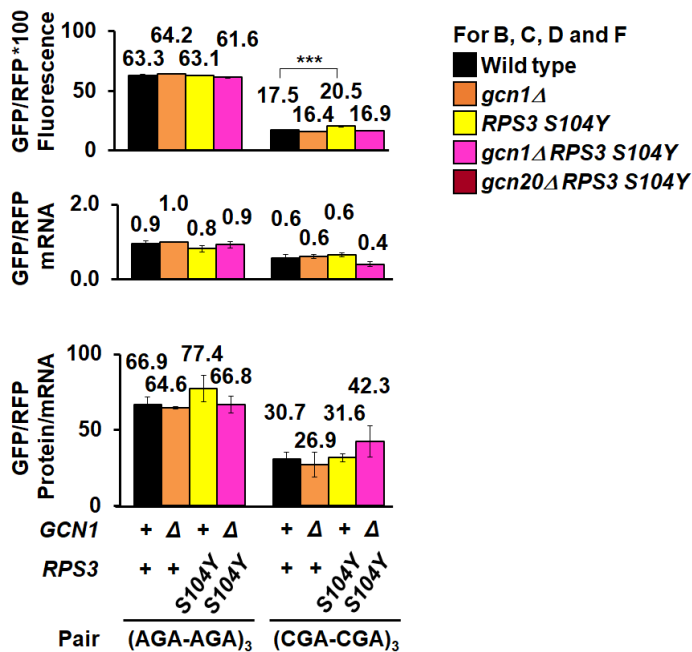

For B, C, D and F

- Wild type
- gcn1Δ*
- RPS3 S104Y*
- gcn1Δ RPS3 S104Y*
- gcn20Δ RPS3 S104Y*

E

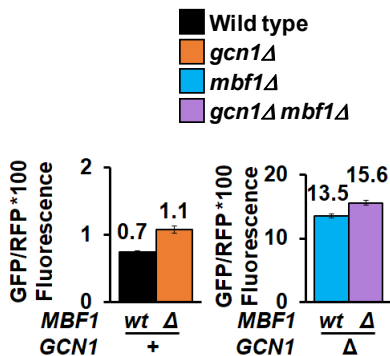

F

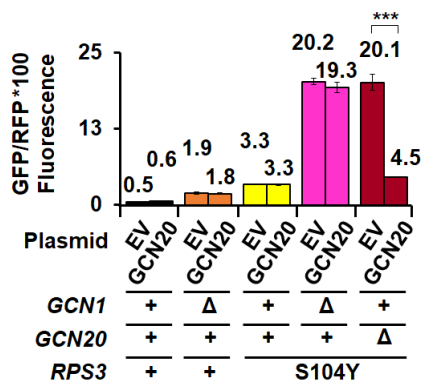

Supplement: supp_078964.121_Supplemental_Fig_S5.pdf [file supp_078964.121_Supplemental_Fig_S5.pdf]
