# Supplementary material for: Frameshifting at collided ribosomes is modulated by elongation factor eEF3 and by integrated stress response regulators Gcn1 and Gcn20
Source: RNA. 2022 Mar;28(3):320–39. doi: 10.1261/rna.078964.121 (PMC8848926; doi:10.1261/rna.078964.121)
Supplement: Supplemental Material [file supp_078964.121_Supplemental_Table_S2.xlsx]

## Sheet: yeast strains
	Table S2 Yeast strains employed in this work
	Strain ID	Genotype
	BY4741	MATa his3 Δ1 leu2 Δ0 met15 Δ0 ura3 Δ0	Open Biosystems
	BY4742	MATα his3 Δ1 leu2 Δ0 lys2 Δ0 ura3 Δ0	Open Biosystems
	YJYW290	BY4741; can1::GLN4(1-99)-(CGA)6+1-URA3, ade2::RFP-GLN4(1-99)-(CGA)4+1-GFP::MET15 [2m, LEU2, ASC1]	Wang et al. (2018)
	YJYW290-P15	BY4741; can1::GLN4(1-99)-(CGA)6+1-URA3, ade2::RFP-GLN4(1-99)-(CGA)4+1-GFP::MET15 [2m, LEU2, ASC1] mbf1-R89K	Wang et al. (2018)
	YJYW290-P15-30	YJYW290-P15, yef3 G1007V K1009fs	This study
	YJYW322	BY4742, can1::GLN4(1-99)-(CGA)6+1-URA3, ade2::RFP-GLN4(1-99)-(CGA)4+1-GFP::HIS5 (S.pombe)	Wang et al. (2018)
	YLB5322-5325	YJYW290-P15, Leu-	This study
	YLB5326	YJYW290-P15-30, Leu-	This study
	YLB5454	YLB5322, [2m, LEU2, Empty Vector]	This study
	YLB5406	YLB5322, [2m, LEU2, Chromosome XII 625169-634747]	This study
	YLB5422	YLB5322, [2m, LEU2, Chromosome XII 634095-645266]	This study
	YLB5438	YLB5322, [2m, LEU2, Chromosome XII 642980-659442]	This study
	YLB5518	YLB5326, [2m, LEU2, Empty Vector]	This study
	YLB5470	YLB5326, [2m, LEU2, Chromosome XII 625169-634747]	This study
	YLB5482	YLB5326, [2m, LEU2, Chromosome XII 634095-645266]	This study
	YLB5502	YLB5326, [2m, LEU2, Chromosome XII 642980-659442]	This study
	YLB5182	YJYW322 mated to YJYW290-P15	This study
	YLB5184	YJYW322 mated to YJYW290-P15-30	This study
	YLB5626	YLB5325, YEF3::kanR	This study
	YLB5638	YLB5325, yef3 G1007V K1009fs::kanR	This study
	YLB5649	YLB5328, YEF3::kanR	This study
	YLB5661	YLB5328, yef3 G1007V K1009fs::kanR	This study
	YLB5541	BY4741, YEF3::URA5 (K.lactis)	This study
	YLB5548	BY4741, yef3 G1007V K1009fs::URA5 (K.lactis)	This study
	YLB5691	YLB5541, YEF3, FOAR	This study
	YLB5715	YLB5548, yef3 G1007V K1009fs, FOAR	This study
	YLB5773	YLB5691, mbf1-R89K-HA::kanR	This study
	YLB5824	YLB5715, mbf1-R89K-HA::kanR	This study
	YLB5830	YLB5691, MBF1-StrepII::kanR	This study
	YLB5841	YLB5715, MBF1-StrepII::kanR	This study
	YLB6404-6407	YLB5830, ade2::RFP-GLN4(1-99)-(AGA)4-GFP::MET15	This study
	YLB6420-6423	YLB5841, ade2::RFP-GLN4(1-99)-(AGA)4-GFP::MET15	This study
	YSMC100	YLB5773, ade2::RFP-GLN4(1-99)-(CGA)4+1-GFP::MET15	This study
	YSMC101	YLB5824, ade2::RFP-GLN4(1-99)-(CGA)4+1-GFP::MET15	This study
	YSMC114	YSMC100, [CEN, LEU2, Empty Vector]	This study
	YSMC115	YSMC100, [2m, LEU2, YEF3]	This study
	YSMC116	YSMC100, [2m, LEU2, yef3 G1007V K1009fs]	This study
	YSMC117	YSMC100, [2m, LEU2, Empty Vector]	This study
	YSMC118	YSMC100, [CEN, LEU2, YEF3]	This study
	YSMC119	YSMC100, [CEN, LEU2, yef3 G1007V K1009fs]	This study
	YSMC120	YSMC101, [CEN, LEU2, Empty Vector]	This study
	YSMC121	YSMC101, [2m, LEU2, YEF3]	This study
	YSMC122	YSMC101, [2m, LEU2, yef3 G1007V K1009fs]	This study
	YSMC123	YSMC101, [CEN, LEU2, Empty Vector]	This study
	YSMC124	YSMC101, [CEN, LEU2, YEF3]	This study
	YSMC125	YSMC101, [CEN, LEU2, yef3 G1007V K1009fs]	This study
	YEVN2629	YLB5691, nmd2D::kanR
	YEVN2637	YLB5715, nmd2D::kanR
	YEVN2456-2461	YLB5691, ade2::RFP-GLN4(1-99)-TRM4+1-GFP::MET15	This study
	YEVN2462-2467	YLB5691, ade2::RFP-GLN4(1-99)-TRM4-GFP::MET15	This study
	YEVN2480-2485	YLB5824, ade2::RFP-GLN4(1-99)-TRM4+1-GFP::MET15	This study
	YEVN2486-2491	YLB5824, ade2::RFP-GLN4(1-99)-TRM4-GFP::MET15	This study
	YEVN2695-2698	YEVN2629, ade2::RFP-Fn3-HIV+1-GFP::MET15
	YEVN2699-2702	YEVN2629, ade2::RFP-Fn3-HIV-GFP::MET15
	YEVN2707-2710	YEVN2637, ade2::RFP-Fn3-HIV+1-GFP::MET15
	YEVN2711-2714	YEVN2637, ade2::RFP-Fn3-HIV-GFP::MET15
	YLB5837	YLB5691, mbf1Δ1::kanR	This study
	YLB5847	YLB5715, mbf1Δ1::kanR	This study
	YLB5908	YLB5773, ade2::RFP-GLN4(1-99)-(CGA)4+1-GFP::MET15	This study
	YLB5956	YLB5824, ade2::RFP-GLN4(1-99)-(CGA)4+1-GFP::MET15	This study
	YLB6004-6007	YLB5837, ade2::RFP-GLN4(1-99)-(CGA)4+1-GFP::MET15	This study
	YLB6020-6023	YLB5847, ade2::RFP-GLN4(1-99)-(CGA)4+1-GFP::MET15	This study
	YLB5853	BY4741; can1::GLN4(1-99)-(CGA)6+1-URA3, ade2::RFP-GLN4(1-99)-(CGA)4+1-GFP::MET15 RPS3-K108N	This study
	YJYW2578	BY4742; can1::GLN4(1-99)-(CGA)6+1-URA3, ade2::RFP-GLN4(1-99)-(CGA)4+1-GFP::MET15, RPS3 S104Y	Wang et al. (2018)
	YLB5749	YJYW2578, YEF3::kanR	This study
	YLB5757	YJYW2578, yef3 G1007V K1009fs::kanR	This study
	YLB6225	YLB5853, YEF3::kanR	This study
	YLB6248	YLB5853, yef3 G1007V K1009fs::kanR	This study
	YLB5912	YLB5773, ade2::RFP-GLN4(1-99)-(AGA-AGA)3-GFP::MET15	This study
	YLB5916	YLB5773, ade2::RFP-GLN4(1-99)-(CGA-CGA)3-GFP::MET15	This study
	YLB5920	YLB5773, ade2::RFP-GLN4(1-99)-(CGA-CGA)3+1-GFP::MET15	This study
	YLB5960	YLB5824, ade2::RFP-GLN4(1-99)-(AGA-AGA)3-GFP::MET15	This study
	YLB5964	YLB5824, ade2::RFP-GLN4(1-99)-(CGA-CGA)3-GFP::MET15	This study
	YLB5968	YLB5824, ade2::RFP-GLN4(1-99)-(CGA-CGA)3+1-GFP::MET15	This study
	YSMC038	YLB5837, ade2::RFP-GLN4(1-99)-(CGA-CGG)+1-GFP::MET15	This study
	YSMC040	YLB5847, ade2::RFP-GLN4(1-99)-(CGA-CGG)+1-GFP::MET15	This study
	YJYW3183	BY4742; can1::GLN4(1-99)-(CGA)6+1-URA3, ade2::RFP-GLN4(1-99)-(CGA)4+1-GFP::MET15 [2m, LEU2, MBF1, ASC1]	This study
	YEVN053	YJYW3183, Leu-	This study
	YEVN054	YEVN053, gcn1Δ::kanR	This study
	YEVN949	YJYW2578, gcn1Δ::kanR	This study
	YEVN1167-1169	YEVN053, [2m, LEU2, Empty Vector]	This study
	YEVN1182-1184	YEVN054, [2m, LEU2, Empty Vector]	This study
	YEVN1197-1199	YJYW2578, [2m, LEU2, Empty Vector]	This study
	YEVN1212-1214	YEVN949, [2m, LEU2, Empty Vector]	This study
	YEVN1155-1157	YEVN053, [CEN, LEU2, GCN1]	This study
	YEVN1170-1172	YEVN054, [CEN, LEU2, GCN1]	This study
	YEVN1185-1187	YJYW2578, [CEN, LEU2, GCN1]	This study
	YEVN1200-1202	YEVN949, [CEN, LEU2, GCN1]	This study
	YEVN384	YEVN053, [2m, LEU2, Empty Vector]	This study
	YEVN497	YEVN054, [2m, LEU2, Empty Vector]	This study
	YEVN1375	YLB5324, gcn1Δ::kanR	This study
	YEVN1681-1684	YLB5324, [2m, LEU2, Empty Vector]	This study
	YEVN1685-1688	YEVN1375, [2m, LEU2, Empty Vector]	This study
	YEVN390	YEVN053, [2m, LEU2, MBF1]	This study
	YEVN502	YEVN054, [2m, LEU2, MBF1]	This study
	YEVN1737-1742	YLB5324, [2m, LEU2, MBF1]	This study
	YEVN1743-1748	YEVN1375, [2m, LEU2, MBF1]	This study
	YJYW3179	BY4741, can1::GLN4(1-99)-(CGA)6+1-URA3, ade2::RFP-GLN4(1-99)-(CGA)4+1-GFP::MET15, [2m, LEU2, MBF1, ASC1]	This study
	YEVN937	YJYW3179, Leu-	This study
	YEVN1577	YEVN937, ade2::RFP-GLN4(1-99)-(AGA-AGA)3-GFP::MET15	This study
	YEVN992	YEVN937, gcn1Δ::kanR	This study
	YEVN1595	YEVN992, ade2::RFP-GLN4(1-99)-(AGA-AGA)3-GFP::MET15	This study
	YEVN1614	YJYW2578, ade2::RFP-GLN4(1-99)-(AGA-AGA)3-GFP::MET15	This study
	YEVN999	YJYW3179, RPS3 S104Y, Leu-	This study
	YEVN1631	YEVN999, ade2::RFP-GLN4(1-99)-(AGA-AGA)3-GFP::MET15	This study
	YEVN1586	YEVN937, ade2::RFP-GLN4(1-99)-(CGA-CGA)3-GFP::MET15	This study
	YEVN1602	YEVN992, ade2::RFP-GLN4(1-99)-(CGA-CGA)3-GFP::MET15	This study
	YEVN1619	YJYW2578, ade2::RFP-GLN4(1-99)-(CGA-CGA)3-GFP::MET15	This study
	YEVN1639	YEVN999, ade2::RFP-GLN4(1-99)-(CGA-CGA)3-GFP::MET15	This study
	YEVN322	YEVN053, gcn20Δ::kanR	This study
	YEVN270	YEVN053, gcn2Δ::kanR	This study
	YEVN070	YEVN053, gcn4Δ::kanR	This study
	YEVN329	YEVN053, yih1Δ::kanR	This study
	YEVN1439	YEVN053, rbg2Δ::kanR	This study
	YEVN1339	YEVN053, gir2Δ::kanR	This study
	YEVN1496	YEVN270, gcn2Δ::natR, gir2Δ::kanR	This study
	YEVN1038	YJYW2578, gcn20Δ::kanR	This study
	YEVN1031	YJYW2578, gcn2Δ::kanR	This study
	YEVN1034	YJYW2578, gcn4Δ::kanR	This study
	YEVN1049	YJYW2578, yih1Δ::kanR	This study
	YEVN1405	YJYW2578, rbg2Δ::kanR	This study
	YEVN1365	YJYW2578, gir2Δ::kanR	This study
	YEVN1529	YEVN1031, gcn2Δ::natR, gir2Δ::kanR	This study
	YSMC20-2	YLB5773, hel2::hygR	This study
	YSMC21-A	YLB5824, hel2Δ::hygR	This study
	YSMC26-2	YLB5773, gcn1::bleoR	This study
	YSMC27-1	YLB5824, gcn1::bleoR	This study
	YSMC102	YSMC20-2, ade2::RFP-GLN4(1-99)-(CGA)4+1-GFP::MET15	This study
	YSMC103	YSMC21-A, ade2::RFP-GLN4(1-99)-(CGA)4+1-GFP::MET15	This study
	YSMC104	YSMC26-2, ade2::RFP-GLN4(1-99)-(CGA)4+1-GFP::MET15	This study
	YSMC105	YSMC27-1, ade2::RFP-GLN4(1-99)-(CGA)4+1-GFP::MET15	This study
	YSMC126	YSMC100, [2m, URA3, Empty Vector]	This study
	YSMC128	YSMC100, [2m, LEU2, Empty Vector]	This study
	YSMC129	YSMC101, [2m, URA3, Empty Vector]	This study
	YSMC131	YSMC101, [2m, LEU2, Empty Vector]	This study
	YSMC133	YSMC101, [CEN, LEU2, YEF3]	This study
	YSMC134	YSMC102, [2m, URA3, Empty Vector]	This study
	YSMC136	YSMC102, [2m, LEU2, Empty Vector]	This study
	YSMC137	YSMC102, [2m, URA3, HEL2]	This study
	YSMC138	YSMC103, [2m, URA3, Empty Vector]	This study
	YSMC140	YSMC103, [2m, LEU2, Empty Vector]	This study
	YSMC141	YSMC103, [2m, URA3, HEL2]	This study
	YSMC144	YSMC104, [2m, URA3, Empty Vector]	This study
	YSMC146	YSMC104, [2m, LEU2, Empty Vector]	This study
	YSMC147	YSMC104, [2m, URA3, GCN1]	This study
	YSMC148	YSMC105, [2m, URA3, Empty Vector]	This study
	YSMC150	YSMC105, [2m, LEU2, Empty Vector]	This study
	YSMC151	YSMC105, [2m, URA3, GCN1]	This study
	YSMC153	YSMC105, [CEN, LEU2, YEF3]	This study
	YSMC170	YSMC102, gcn1::bleoR	This study
	YSMC172	YSMC103, gcn1::bleoR	This study
	YSMC174	YSMC170, [2m, URA3, Empty Vector]	This study
	YSMC175	YSMC170, [2m, URA3, HEL2]	This study
	YSMC176	YSMC170, [2m, URA3, GCN1]	This study
	YSMC177	YSMC172, [2m, URA3, Empty Vector]	This study
	YSMC178	YSMC172, [2m, URA3, HEL2]	This study
	YSMC179	YSMC172, [2m, URA3, GCN1]	This study
	YSMC180	YSMC100, [2m, URA3, HEL2]	This study
	YSMC181	YSMC100, [2m, URA3, GCN1]	This study
	YSMC182	YSMC100, [CEN, LEU2, YEF3]	This study
	YSMC183	YSMC100, [2m, LEU2, MBF1]	This study
	YSMC184	YSMC101, [2m, URA3, HEL2]	This study
	YSMC185	YSMC101, [2m, URA3, GCN1]	This study
	YSMC186	YSMC101, [2m, LEU2, MBF1]	This study
	YSMC187	YSMC102, [2m, URA3, GCN1]	This study
	YSMC188	YSMC102, [CEN, LEU2, YEF3]	This study
	YSMC189	YSMC102, [2m, LEU2, MBF1]	This study
	YSMC190	YSMC103, [2m, URA3, GCN1]	This study
	YSMC191	YSMC103, [2m, LEU2, MBF1]	This study
	YSMC192	YSMC104, [2m, URA3, HEL2]	This study
	YSMC193	YSMC104, [CEN, LEU2, YEF3]	This study
	YSMC194	YSMC104, [2m, LEU2, MBF1]	This study
	YSMC195	YSMC105, [2m, URA3, HEL2]	This study
	YSMC196	YSMC105, [2m, LEU2, MBF1]	This study
	YSMC197	YSMC170, [2m, LEU2, Empty Vector]	This study
	YSMC198	YSMC170, [CEN, LEU2, YEF3]	This study
	YSMC199	YSMC170, [2m, LEU2, MBF1]	This study
	YSMC200	YSMC172, [2m, LEU2, Empty Vector]	This study
	YSMC201	YSMC172, [CEN, LEU2, YEF3]	This study
	YSMC202	YSMC172, [2m, LEU2, MBF1]	This study
	YLB6504	YLB5691, MBF1-HA::kanR	This study
	YLB6516	YLB5715, MBF1-HA::kanR	This study
	YLB6436-6439	YLB5830, TY1 in frame	This study
	YLB6440-6441	YLB5830, TY1 -1 frame	This study
	YLB6444-6447	YLB5830, TY1 +1 frame	This study
	YLB6460-6463	YLB5841, TY1 in frame	This study
	YLB6464-6467	YLB5841, TY1 -1 frame	This study
	YLB6468-6471	YLB5841, TY1 +1 frame	This study
	YLB5976-5979	YLB5830, ade2::RFP-GLN4(1-99)-(AGA-AGA)3-GFP::MET15	This study
	YLB5980-5983	YLB5830, ade2::RFP-GLN4(1-99)-(CGA-CGA)3-GFP::MET15	This study
	YLB5984-5987	YLB5830, ade2::RFP-GLN4(1-99)-(CGA-CGA)3+1-GFP::MET15	This study
	YLB5992-5995	YLB5841, ade2::RFP-GLN4(1-99)-(AGA-AGA)3-GFP::MET15	This study
	YLB5996-5999	YLB5841, ade2::RFP-GLN4(1-99)-(CGA-CGA)3-GFP::MET15	This study
	YLB6000-6003	YLB5841, ade2::RFP-GLN4(1-99)-(CGA-CGA)3+1-GFP::MET15	This study
	YLB6008-6011	YLB5837, ade2::RFP-GLN4(1-99)-(AGA-AGA)3-GFP::MET15	This study
	YLB6012-6015	YLB5837, ade2::RFP-GLN4(1-99)-(CGA-CGA)3-GFP::MET15	This study
	YLB6016-6019	YLB5837, ade2::RFP-GLN4(1-99)-(CGA-CGA)3+1-GFP::MET15	This study
	YLB6024-6027	YLB5847, ade2::RFP-GLN4(1-99)-(AGA-AGA)3-GFP::MET15	This study
	YLB6028-6031	YLB5847, ade2::RFP-GLN4(1-99)-(CGA-CGA)3-GFP::MET15	This study
	YLB6032-6035	YLB5847, ade2::RFP-GLN4(1-99)-(CGA-CGA)3+1-GFP::MET15	This study
	YEVN965	YEVN053, [CEN, LEU2, RPS3]	This study
	YEVN971-973	YEVN054, [CEN, LEU2, RPS3]	This study
	YEVN968	YJYW2578, [CEN, LEU2, RPS3]	This study
	YEVN978-983	YEVN949, [CEN, LEU2, RPS3]	This study
	YEVN273	YEVN054, gcn2D::kanR	This study
	YEVN2111	YEVN273, gcn1D::bleoR	This study
	YEVN2114	YEVN273, gcn1D::bleoR	This study
	YEVN1030	YJYW2578, gcn2D::kanR	This study
	YEVN1031	YJYW2578, gcn2D::kanR	This study
	YEVN2107	YEVN1031, gcn1D::bleoR	This study
	YEVN2121	YEVN1031, gcn1D::bleoR	This study
	YEVN1227	YEVN1038, [2m, LEU2]	This study
	YEVN1215	YEVN1038, [CEN, LEU2, GCN1]	This study
	YEVN1161	YEVN053, [2m, LEU2, Chromosome VI 157431-168628]	This study
	YEVN1176	YEVN054, [2m, LEU2, Chromosome VI 157431-168628]	This study
	YEVN1191	YJYW2578, [2m, LEU2, Chromosome VI 157431-168628]	This study
	YEVN1221	YEVN1038, [2m, LEU2, Chromosome VI 157431-168628]	This study
	YEVN967	YEVN053, [2m, LEU2]	This study
	YEVN977	YEVN054, [2m, LEU2]	This study
	YEVN970	YJYW2578, [2m, LEU2]	This study
	YEVN984	YEVN949, [2m, LEU2]	This study
	YEVN965	YEVN053, [2m, LEU2, RPS3]	This study
	YEVN968	YJYW2578, [2m, LEU2, RPS3]	This study
	YEVN966	YEVN053, [2m, LEU2, RPS3 K108E]	This study
	YEVN974	YEVN054, [2m, LEU2, RPS3 K108E]	This study
	YEVN969	YJYW2578, [2m, LEU2, RPS3 K108E]	This study
	YEVN981	YEVN949, [2m, LEU2, RPS3 K108E]	This study
	YEVN690	YEVN053, mbf1Δ::kanR	This study
	YEVN678	YEVN054, gcn1Δ::natR	This study
	YEVN704	YEVN678, mbf1Δ::kanR	This study
	YSMC219	YLB5837, ade2::RFP-GLN4(1-99)-(CGA)4+1-GFP::MET15	This study
	YSMC220	YLB5847, ade2::RFP-GLN4(1-99)-(CGA)4+1-GFP::MET15	This study
	YSMC18-1	YLB5837, hel2D::hygR	This study
	YSMC19-1	YLB5847, hel2D::hygR	This study
	YSMC24-1	YLB5837, gcn1D::bleoR	This study
	YSMC25-2	YLB5847, gcn1D::bleoR	This study
	YSMC221	YSMC18-1, ade2::RFP-GLN4(1-99)-(CGA)4+1-GFP::MET15	This study
	YSMC223	YSMC19-1, ade2::RFP-GLN4(1-99)-(CGA)4+1-GFP::MET15	This study
	YSMC225	YSMC24-1, ade2::RFP-GLN4(1-99)-(CGA)4+1-GFP::MET15	This study
	YSMC226	YSMC25-2, ade2::RFP-GLN4(1-99)-(CGA)4+1-GFP::MET15	This study
	YSMC287-1	221-1, [2m, URA3, HEL2]	This study
	YSMC295	YSMC287-1, gcn1D::bleoR	This study
