# Supplementary material for: Frameshifting at collided ribosomes is modulated by elongation factor eEF3 and by integrated stress response regulators Gcn1 and Gcn20
Source: RNA. 2022 Mar;28(3):320–39. doi: 10.1261/rna.078964.121 (PMC8848926; doi:10.1261/rna.078964.121)
Supplement: Supplemental Material [file supp_078964.121_Supplemental_Table_S3.xlsx]

## Sheet: plasmids
Table S3 Plasmids employed in this work
Plasmid Name	Parent	Description	Source
pAVA0577		2m, LEU2 vector	(Alexandrov et al. 2006)
pAVA0581		CEN, LEU2 vector	(Alexandrov et al. 2006)
pEJYW279		Bluescript with MBF1-HA+kanR	(Wang et al. 2018)
pELB1418	EJYW279	mbf1-R89K-HA + kanR	This study
pEAW012		int, RFP-PGAL1,10-Rluc-GFP, MET15	(Letzring et al. 2013)
pEAW315		int, RFP-PGAL1,10-GLN4(1-99)-GFP, MET15	(Gamble et al. 2016)
pEAW263	pEAW315	(CGA)4+1 in GLN4(1-99)-GFP	(Wang et al. 2018)
pEAW468	pEAW315	(AGA-AGA)3 in GLN4(1-99)-GFP	(Wang et al. 2018)
pEAW471	pEAW315	(CGA-CGA)3 in GLN4(1-99)-GFP	(Wang et al. 2018)
pEAW474	pEAW315	(CGA-CGA)3+1 in GLN4(1-99)-GFP	(Wang et al. 2018)
pELB798		int, RFP-FN3-LIC cloning site-GFP::MET15	This study
pEEVN295	pELB798	gbEP07 inserted betweenApaI/SaII	This study
pEEVN301	pELB798	gbEP08 inserted betweenApaI/SaII	This study
pEAW161	pEAW012	TY1 sequence (in frame) in Rluc-GFP	(Wang et al. 2018)
pEAW165	pEAW012	TY1 sequence (-1 frame) in Rluc-GFP	(Wang et al. 2018)
pEAW169	pEAW012	TY1 sequence (+1 frame) in Rluc-GFP	(Wang et al. 2018)
pEJYW400-2	pEAW315	(CGA-CGG) in GLN4(1-99)-GFP	(Wang et al. 2018)
pEJYW401-1	pEAW315	(CGA-CGG)+1 in GLN4(1-99)-GFP	(Wang et al. 2018)
pELB1552	pEAW315	(AGA-AGA) in GLN4(1-99)-GFP	This study
pELB1558	pEAW315	(AGA-AGA)+1 in GLN4(1-99)-GFP	This study
pYGPM28d02		Chromosome XII: 625169-634747	(Jones et al. 2008)
pYGPM29b03		Chromosome XII: 634095-645266	(Jones et al. 2008)
pYGPM3b18		Chromosome XII: 642980-659442	(Jones et al. 2008)
pELB1264	pEJYW279	from +1 to +207 bp in YEF3 3'UTR between NheI and NotI	This study
pELB1306	pELB1264	from 1640 bp in YEF3 to +305 bp 3'UTR of YEF3 wt between XmaI and AatII	This study
pELB1310	pELB1264	from 1640 bp in YEF3 to +305 bp 3'UTR of yef3 G1007V K1009fs between XmaI and AatII	This study
pEJYW056	pEAW315	(AGA)4 in GLN4(1-99)-GFP	(Wolf and Grayhack 2015)
pEJYW051	pEAW315	(CGA)4 in GLN4(1-99)-GFP	(Wolf and Grayhack 2015)
pECB1330		Bluescript with K.lactis URA5 between SacI and NheI	This study
pELB1258-1259	pECB1330	pECB1330, from +1 to +207YEF3 3'UTR between NheI and NotI	This study
pELB1274	pELB1258	1640 base pairs in YEF3 coding sequence +305 base paris 3'UTR between MluI and SacI	This study
pELB1286	pELB1259	1640 base pairs in YEF3 coding sequence +305 base paris 3'UTR between MluI and SacI	This study
pELB1278	pELB1258	yef3 G1007V K1009fs final 1495 base pairs +305 base paris 3'UTR between MluI and SacI	This study
pELB1290	pELB1259	yef3 G1007V K1009fs final 1495 base pairs +305 base paris 3'UTR between MluI and SacI	This study
pEEVN246	pAVA0581	CEN, LEU2, yef3 G1007V K1009fs	This study
pEEVN250	pAVA0581	CEN, LEU2, YEF3	This study
pEEVN257	pAVA577	2m LEU2, YEF3	This study
pEEVN264	pAVA577	2m LEU2, yef3 G1007V K1009fs	This study
pELB1265	pEJYW279	from +1 to +207 bp in YEF3 3'UTR between NheI and NotI	This study
pELB1314	pELB1265	from -40 5'UTR to +305 3'UTR YEF3 between XmaI and AatII	This study
pELB1319	pELB1265	from -40 5'UTR to +305 3'UTR yef3 G1007V K1009fs between XmaI and AatII	This study
pEJYW292	pAVA0581	CEN, LEU2, RPS3	Wang et al 2018
pEJYW287	pAVA0577	2m, LEU2, RPS3K108E	Wang et al 2018
pEJYW203	pAVA0577	2m, LEU2, MBF1	Wang et al 2018
pYGPM18l02		Chromosome VI: 157431-168628	(Jones et al. 2008)
pEEVN237	pAVA0581	from -714 to +305 YEF3	This study
pEEVN250	pEEVN237	YEF3 WT	This study
pEEVN246	pEEVN237	yef3 G1007V K1009fs	This study
pEEVN109	pAVA0581	-804 5'UTR to +341 3'UTR GCN1	This study
pEEVN129	pEEVN109	pEEVN109 NruI, XmaI digested excised from Yeast after GAP repair	This study
YEPlac195		2m, URA3	Gietz and Sugino
pEEVN229	YEPlac195	2m, URA3, GCN1	This study
pSC007	YEPlac195	2m, URA3, HEL2	This study
