# Supplementary material for: Frameshifting at collided ribosomes is modulated by elongation factor eEF3 and by integrated stress response regulators Gcn1 and Gcn20
Source: RNA. 2022 Mar;28(3):320–39. doi: 10.1261/rna.078964.121 (PMC8848926; doi:10.1261/rna.078964.121)
Supplement: Supplemental Material [file supp_078964.121_Supplemental_Table_S4.xlsx]

## Sheet: oligos
Table S4 Oligonucleotides employed in this work
Oligo ID	Description	Sequence (5'-3')
gbLB256	mbf1-R89K gene block	GGATTGGACGAGGATCCAAATGTCGGTAGGGCCATCTCGCGTGCCAAAACAGACAAGAAAATGTCGCAGAAGGATTTGGCAACCAAAATTAACGAAAAGCCAACCGTGGTAAACGATTATGAAGCCGCTAGAGCTATTCCAAACCAACAAGTTTTGTCTAAGTTGGAAAGAGCCTTAGGCGTTAAATTGAGAGGTAACAACATCGGTTCGCCTTTGGGAGCTCCAAAGAAGAAACGTACGCTGCAGGTCGACTACCCATACGACGTCATTGGTCACTTCACTTTG
gbLB239	YEF3 3'UTR gene block	GGATTGGACGAGCTAGCTCTTTTTGATCACTGCTTTCACAGTTTTCTTTAAGATTTTTATTGATCAATAATTTATGTATATTTTAATTTCTATGTTTTTGTAATATTGTTTATTTTGGTAAAATATAGACGCAACTTCCTTATTATAAAGAAAGGCATTATTTAAAAGAAAAAGCGTTCCATTAGTCAGACATCTTTTTTTTTCATACATTCTTAAGCTCAGGCGGCCGCATTGGTCACTTCACTTTG
OLB262	Single in frame optimal reporter forward	GGTCACTAACTTAAGAAGAGGCACAACCTGGTCTCACCCACAATTCGAAAAAA
OLB263	Single in frame optimal reporter reverse 1	TTAAGTTAGTGACCTTAGATCCAGGACCCTGAGTTTGAGCCTCTAAAGT
OLB264	Single in frame optimal reporter reverse 2	CTTCCAAACCACTTTTTTCGAATTGTGGGTGAGACCAGGTTGTGCCTCTTC
OLB265	Single +1 frame optimal reporter forward	GGTCACTAACTTAAGAAGACACAACCTGGTCTCACCCACAATTCGAAAAAA
OLB266	Single +1 frame optimal reporter reverse	CTTCCAAACCACTTTTTTCGAATTGTGGGTGAGACCAGGTTGTGTCTTC
OLB257	YEF3, last 810 nucleotides and MYC tag first round PCR Forward	GATTAGCGAGGAAGATCTGCAAATCAACGAAAACGATGCTGAAG
OLB258	YEF3, last 810 nuclotides and xbaI ATG MYC tag second round PCR Forward	ACTAGGtCTAGAATGGAGCAGAAGCTGATTAGCGAGGAAGATCTGCAAAT
OLB267	YEF3, +174 3'UTR +PstI + 10nt	CGATACTAGATCTGCAGGTCTGACTAATGGAACGCTTTTTC
OLB236	YEF3, +305 3'UTR +AatII and 10nt PCR Reverse	GAGTACCAATGACGTCAAGCTTCCTAGTCTATGATCCGTC
OLB247	YEF3, 1640 cds +XmaI+8bp Forward	GCATTCGCCCCGGGTTGGAAGATGAAGTTGGCTCTAG
OLB248	YEF3, -40 5'UTR +XmaI+8bp Forward	GCATTCGCCCCGGGGTGTATTTTTCTAGTTCGAATCCATCG
OLB235	YEF3, 1640 cds +MluI+8bp Forward	GGATTGGCACGCGTTTGGAAGATGAAGTTGGCTCTAG
OLB237	YEF3, +305 3'UTR +SacI and 10nt	CGTGACCAATGAGCTCAAGCTTCCTAGTCTATGATCCGTC
gbEP07	TRM140 insert +1 Frame	CTTCTAAgccaatttccattaactacagaaccacctctactaacttaattaatagtggtacgggccctAACAAAAAAAAAAACAAGAAGAAGAGAAATGGAAATGTTAACACCAACGCTAATGTCGACGACAGCACCAAAACCGGTGAAAATGATGATACAACCGGCGACACCACGTCATCAACAACCTCCGCCATTCAAGAAGTGAATGATTTGGAAGTTGTTGATGACTCTTGTCTTAGGCATTGATCAACAGCATAATAGGGAGCATTTGAAAGCGTTAACTCAGGACGTTAAAGAAGAGACGTTAGAGAATATTGCGCACGAGGGCAGAGGTGATAACACAGGCGATCAGAATGCAGTAGAAgtcgacgcacgtggtttggaagctttgttccaa…
gbEP08	TRM140 insert in Frame	CTTCTAAgccaatttccattaactacagaaccacctctactaacttaattaatagtggtacgggccctAACAAAAAAAAAAACAAGAAGAAGAGAAATGGAAATGTTAACACCAACGCTAATGTCGACGACAGCACCAAAACCGGTGAAAATGATGATACAACCGGCGACACCACGTCATCAACAACCTCCGCCATTCAAGAAGTGAATGATTTGGAAGTTGTTGATGACTCTTGTCTTGGCATTGATCAACAGCATAATAGGGAGCATTTGAAAGCGTTAACTCAGGACGTTAAAGAAGAGACGTTAGAGAATATTGCGCACGAGGGCAGAGGTGATAACACAGGCGATCAGAATGCAGTAGAAgtcgacgcacgtggtttggaagctttgttccaag…
OMT215	GCN1, -326 5'UTR Forward	ATCAAAGCATCTCTGTGTCTATG
OMT216	GCN1, +443 3'UTR Reverse	GTTCATGTAATACATCTGGACAATTATG
OMT217	GCN20, -350 5'UTR Forward	CTAATTATCATTCGTTACATCTCAAATTG
OMT218	GCN20, +362 3'UTR Reverse	AAACGTTTCTCCGCTCATATTTTAAC
OLH673	GCN2, -241 5'UTR Forward	GAGATAAGAACCTGGTGTAATCAATC
OLH674	GCN2, +259 3'UTR Reverse	CCTCACACAACATACGCACAC
OYK474	GCN4, -504 5'UTR Forward	CATCAGTTTCACTAGCGAATTATACAACTCAC
OYK475	GCN4, +435 3' UTR Reverse	GTATACATAATACTATAGCCTTGATCAACAATG
OEP001	YIH1, -252 5'UTR Forward	GTCATAACAGTGCACAGCCTC
OEP002	YIH1, +280 3' UTR Reverse	TACCTTGCCTGTAGACCGTAC
OEP094	RBG2, -191 5' UTR Forward	CGTGTCACGTAGTTACCTCAC
OEP095	RBG2, +494 3' UTR Reverse	CTTATACGTTAGAGTAGGTTAGC
OEP086	GIR2, -245 5' UTR Forward	GAGATGTGAGAGAAGTGGGC
OEP087	GIR2, +307 3' UTR Reverse	CAGGCTACAAAGGACAAGTCG
OEP152	YEF3, -714 to -652 with PstI site Forward	GCCACTATCAGGGAATAGCAAC
OEP153	YEF3, +202 to +226 Reverse	GTTAGCAATGTGAGCAACAGCTTG
gbEP03	YEF3, -714 to -652, MluI, XbaI, +245 to +305 AatII, gene block	TTGCATGGTCTGCAGTCTCCACGCCACTATCAGGGAATAGCAACTTTCCCTTCTGTTTCAATCTTTTTACCTATTCCTTTTTACGCGTTTGAGGACCTTGAAGTCTAGAACGAAAATATTTTTTTGGAAGAATAAAAATAGGTGACGGATCATAGACTAGGAAGCTTGACGTCCGCTACTAAGgaattcTGCCTCTCGA
gbEP01	GCN1, -804 to -342 NruI, XmaI, 798 GCN1 ORF to +341 3'UTR GCN1	TGAGTTAGCTCACTCATTAGCTGCAGCGCTTGAAATCCACTGCGGTAATTACTGCATGTATGACCTGCAACAGGTGGCAACAGGCTGTGTCCAAGATCACGAATTGTCTGGTTTTGTATTAGGAACAGTACTATCATCTTACCCTTCTAGAGGTGAATTGTTGAGTAATACAGGTGTAATGTGTCTAACGCGAGAAGCATCCTCAATAAAAGGGTTTGGAATATGTGCTGATTTGGAACATGTGTTAAAATCCGAGAGTTTCAGTAGGGAATGGTATGTAGCAAGGGTCTCTCAAGAACACGGGATACTGAGGCCAATAAGAAACTGGAACGAAACTACTCCATTAAAATTAGGCAGCAAAATTGCCGTCCTTCCTCAACACGCTTGTATCACAATGGG…
OEP063	GCN1, -406 5' UTR Forward	AACAGCGAAGGCATTGTCAACG
OEP064	GCN1, +299 in GCN1 ORF Reverse	GGATTACTGATGACCACGTCG
OSC007	HEL2, 5' primer to add HindIII upstream	cccAAcGCAT AAGCTT AGTACAATTCAGGAACTCATATTAACAC
OSC008	HEL2, 3' primer to add EcoRI downstream	cgaagcgtgtt GGATCC GTTGTCTTATGAGCTGGTGTAAAGAG
OEP015	MBF1, -194 5'UTR Forward	GATCACCATCGTTGCCTCTTTC
OJYW125	MBF1, +300bp 3'UTR reverse	GTCTACAAGCTTCTCGCATACAATGATGAGAGTTTAG
OEP132	GCN1, -31bp 5'UTR Round one for antibiotic cassettes	GCTCTGACTGACACCAATAACTAGATCTGTTTAGCTTGCCTCGT
OEP133	GCN1, +26bp 3'UTR	AACGAGGTTACCACATTGAATTTTCCGTTTTCGACACTGGATGGC
OEP134	GCN1, -69bp 5'UTR	ACTTATTAAACCTGAAGTAGATCATTAAGACAAACAAAGCTCTGACTGACACCAATAACT
OEP135	GCN1, +61bp 3'UTR	TATATAACGAGAATAATATATCAAATACAAAAAGTAACGAGGTTACCACATTGAATTTTC
